# Supplementary material for: Long COVID Disability Burden in US Adults: YLDs and NIH Funding Relative to Other Conditions
Source: bioRxiv or medRxiv preprint supplement (doi:10.1101/2024.01.09.24301057), 2024-01-10
Supplement: Supplementary file [file media-1.pdf]

## Supplement Table 1: Evidence Review

| Sample Setting, Size                                                                                                                                                                                                                                                             | Data/ Source(s)                                                                                                                                           | Prevalence: Overall & Symptoms                                                                                                                                                                                                                                                                                                                                                                                                                                                                                                                       | Functional Measure: Disability, Activity, Quality of Life (QOL)                                                                                                                                                                                                                                                                                                                                                                                                                 |
|----------------------------------------------------------------------------------------------------------------------------------------------------------------------------------------------------------------------------------------------------------------------------------|-----------------------------------------------------------------------------------------------------------------------------------------------------------|------------------------------------------------------------------------------------------------------------------------------------------------------------------------------------------------------------------------------------------------------------------------------------------------------------------------------------------------------------------------------------------------------------------------------------------------------------------------------------------------------------------------------------------------------|---------------------------------------------------------------------------------------------------------------------------------------------------------------------------------------------------------------------------------------------------------------------------------------------------------------------------------------------------------------------------------------------------------------------------------------------------------------------------------|
| Centers for Disease Control and Prevention/ National Center for Health Statistics<br>Long Covid; Household Pulse Survey (website) <a href="#">Link</a>                                                                                                                           |                                                                                                                                                           |                                                                                                                                                                                                                                                                                                                                                                                                                                                                                                                                                      |                                                                                                                                                                                                                                                                                                                                                                                                                                                                                 |
| <ul style="list-style-type: none"> <li>○ National Center for Health Statistics (<a href="#">NCHS</a>) (items) + US Census (sampling frame)</li> </ul>                                                                                                                            | <ul style="list-style-type: none"> <li>○ 6/2022</li> <li>○ Online - text &amp; email recruit</li> <li>○ Panels</li> <li>○ Experimental</li> </ul>         | <p><u>Long Covid Definition:</u> Covid <math>\geq</math> 3 months prior;<br/><i>Specific queries range of Long Covid symptoms, e.g., fatigue, brain fog. As of April 2023:</i></p> <ul style="list-style-type: none"> <li>● <u>Ever Had Long Covid:</u> <ul style="list-style-type: none"> <li>○ % All US adults: 15.1%</li> <li>○ % who ever had Covid: 27.8%</li> </ul> </li> <li>● <u>Currently Have Long Covid:</u> <ul style="list-style-type: none"> <li>○ % All US adults: 5.6%</li> <li>○ % who ever had Covid: 10.1%</li> </ul> </li> </ul> | <p><u>Activity Limitations from Long Covid, as of April 2023</u></p> <ul style="list-style-type: none"> <li>● <u>Among All US Adults:</u> <ul style="list-style-type: none"> <li>○ Any activity limits 27.8%</li> <li>○ Significant limits 4.6%</li> </ul> </li> <li>● <u>Among Adults Who Currently Have Long Covid:</u> <ul style="list-style-type: none"> <li>○ Any activity limits: 79%<sup>o</sup></li> <li>○ Significant limits: 23.6%<sup>=</sup></li> </ul> </li> </ul> |
| Ford et. al., 2023 <sup>1</sup><br>Long COVID and Significant Activity Limitation Among Adults, by Age — United States, June 1–13, 2022, to June 7–19, 2023                                                                                                                      |                                                                                                                                                           |                                                                                                                                                                                                                                                                                                                                                                                                                                                                                                                                                      |                                                                                                                                                                                                                                                                                                                                                                                                                                                                                 |
| <ul style="list-style-type: none"> <li>○ National Center for Health Statistics (<a href="#">NCHS</a>) (items) + US Census (sampling frame)</li> <li>○ Subset w Current</li> </ul>                                                                                                | <ul style="list-style-type: none"> <li>○ 6/2022-6/2023</li> <li>○ Online - text &amp; email recruit</li> <li>○ Panels</li> <li>○ Experimental</li> </ul>  | <p><u>Long Covid Definition:</u> Covid <math>\geq</math> 3 months prior, June 2023</p> <ul style="list-style-type: none"> <li>● <u>Among Adults w Current LC:</u> <ul style="list-style-type: none"> <li>○ Limited “A lot “ 26.4% (95% CI: 24.0-8.9)</li> </ul> </li> </ul>                                                                                                                                                                                                                                                                          | <p>Persistence of Significant Activity Limitations from Long Covid,</p> <p>Prevalence- of significant activity liti-stable over 1 year study period (-0.05% change per cycle, p=0.72)</p>                                                                                                                                                                                                                                                                                       |
| Lau et. al., 2023. <sup>2</sup><br>Physical and Mental Health Disability Associated with Long-Covid: Baseline Results From a US Nationwide Cohort. <a href="#">LINK</a>                                                                                                          |                                                                                                                                                           |                                                                                                                                                                                                                                                                                                                                                                                                                                                                                                                                                      |                                                                                                                                                                                                                                                                                                                                                                                                                                                                                 |
| <ul style="list-style-type: none"> <li>● Hopkins Study (US)</li> <li>● 18+ years</li> <li>● Hospital + Non-Hospital</li> <li>● Baseline Status: <ul style="list-style-type: none"> <li>○ Long Covid: 7,926</li> <li>○ Resolved: 948</li> <li>○ Never: 633</li> </ul> </li> </ul> | <ul style="list-style-type: none"> <li>● 1/2020-6/2022</li> <li>● Prospective</li> <li>● Online survey</li> <li>● Social media &amp; community</li> </ul> | <p><u>Long Covid Definition:</u> Covid <math>\geq</math> 3 months prior</p>                                                                                                                                                                                                                                                                                                                                                                                                                                                                          | <p>Long Covid Group:</p> <ul style="list-style-type: none"> <li>● 65% had <math>\geq</math> 1 disability <ul style="list-style-type: none"> <li>● <u>Mobility</u> (difficult: walk ¼ mile or 10 steps) = 41%</li> <li>● <u>IADL</u>- some difficulty= 57%</li> <li>● <u>Mental fatigue</u>, severe= 6.7%</li> </ul> </li> </ul>                                                                                                                                                 |
| Ma et. al., 2023. <sup>3</sup><br>Long-Term Consequences of Asymptomatic SARS-CoV-2 Infection: A Systematic Review and Meta-Analysis. <a href="#">Link</a>                                                                                                                       |                                                                                                                                                           |                                                                                                                                                                                                                                                                                                                                                                                                                                                                                                                                                      |                                                                                                                                                                                                                                                                                                                                                                                                                                                                                 |
| <ul style="list-style-type: none"> <li>● 3 Countries- not US*</li> <li>● 941* (adults)</li> <li>● Criteria: <math>\geq</math> 3 month follow up</li> <li>● <i>Asymptomatic</i>- no symptoms at time of (+) test</li> <li>● <i>Symptomatic</i>- not defined</li> </ul>            | <ul style="list-style-type: none"> <li>● 2020 &amp; 2021<sup>†</sup></li> <li>● Observational Cohort Studies</li> </ul>                                   | <p><u>Long Covid Definition:</u> unstated, but criteria for study entry: <math>\geq</math> 3-month follow-up</p> <p><u>Prevalence- Asymptomatic Adults:</u></p> <ul style="list-style-type: none"> <li>● <math>\geq</math> 1 Symptom. 21%</li> <li>● Fatigue. 15%</li> <li>● Muscle/Joint. 9%</li> <li>● Dyspnea. 9%</li> </ul> <p><u>Asymptomatic v Symptomatic:</u></p> <ul style="list-style-type: none"> <li>● OR for <math>\geq</math> 1 Symptom: 0.80</li> </ul>                                                                               | NA                                                                                                                                                                                                                                                                                                                                                                                                                                                                              |
| Ma et. al., 2022. <sup>4</sup><br>Long-Term Consequences of Covid 19 at 6 Months and Above: A Systematic Review and Meta-Analysis. <a href="#">Link</a>                                                                                                                          |                                                                                                                                                           |                                                                                                                                                                                                                                                                                                                                                                                                                                                                                                                                                      |                                                                                                                                                                                                                                                                                                                                                                                                                                                                                 |
| <ul style="list-style-type: none"> <li>● Global</li> <li>● 10,945 cases/40 studies</li> <li>● Criteria: <math>\geq</math>6-month Follow-up</li> </ul>                                                                                                                            | <ul style="list-style-type: none"> <li>● &lt; 2/9/2022</li> <li>● Observational cohort studies</li> </ul>                                                 | <p><u>Long Covid Definition:</u> <math>\geq</math>6-month post-PCR confirmed Covid*</p> <p><u>Prevalence: 6-12 months/ &gt; 12 months:</u></p> <ul style="list-style-type: none"> <li>● Long Covid: 64% / 59%</li> <li>● Fatigue/muscle weak: 54% / 34%</li> </ul>                                                                                                                                                                                                                                                                                   | <p><u>Impact on Quality of Life: @ 6-12 months/ @&gt; 12 months:</u></p> <ul style="list-style-type: none"> <li>● Pain/discomfort 33% / 35%</li> <li>● Usual activity 7%/11%</li> <li>● Personal care 1% /1%</li> </ul>                                                                                                                                                                                                                                                         |

|                                                                                                                                                                                                                                                                                                                                           |                                                                                                                                                                     |                                                                                                                                                                                                                                                                                                                                                                            |                                                                                                                                                                                                                                                                                                                     |
|-------------------------------------------------------------------------------------------------------------------------------------------------------------------------------------------------------------------------------------------------------------------------------------------------------------------------------------------|---------------------------------------------------------------------------------------------------------------------------------------------------------------------|----------------------------------------------------------------------------------------------------------------------------------------------------------------------------------------------------------------------------------------------------------------------------------------------------------------------------------------------------------------------------|---------------------------------------------------------------------------------------------------------------------------------------------------------------------------------------------------------------------------------------------------------------------------------------------------------------------|
| <ul style="list-style-type: none"> <li>NA: age, hospital, symptomatic</li> </ul>                                                                                                                                                                                                                                                          |                                                                                                                                                                     | <ul style="list-style-type: none"> <li>Dyspnea: 75% / 81%</li> <li>Anxious/depressed: 33% / 35%</li> </ul>                                                                                                                                                                                                                                                                 | <ul style="list-style-type: none"> <li>Mobility 10% / 9%</li> </ul>                                                                                                                                                                                                                                                 |
| Perlis et. al. ,2022: <sup>5</sup><br>Prevalence and Correlates of Long Covid Symptoms Among US Adults. <a href="#">Link</a>                                                                                                                                                                                                              |                                                                                                                                                                     |                                                                                                                                                                                                                                                                                                                                                                            |                                                                                                                                                                                                                                                                                                                     |
| <ul style="list-style-type: none"> <li>Covid States Project- 8 waves (US)</li> <li>16,091; had Covid</li> </ul>                                                                                                                                                                                                                           | <ul style="list-style-type: none"> <li>2/2021-7/2022</li> <li>Non-probability sample</li> <li>Internet sample</li> </ul>                                            | <u>Long Covid Definition:</u> Covid >= 2 months prior<br><u>Prevalence=</u> 14.7%<br><u>US Est. Prevalence=</u> 13.9%<br><u>See Table:</u> fatigue (52%), brain fog or memory (46%)s, shortness of breath (40%)                                                                                                                                                            | NA                                                                                                                                                                                                                                                                                                                  |
| <b>Sample Setting, Size</b>                                                                                                                                                                                                                                                                                                               | <b>Data/ Source(s)</b>                                                                                                                                              | <b>Prevalence: Overall &amp; Symptoms</b>                                                                                                                                                                                                                                                                                                                                  | <b>Functional Measure: Disability, Activity, Quality of Life (QOL)</b>                                                                                                                                                                                                                                              |
| Rahmati et. al. 2023: <sup>6</sup><br>Systematic review & meta-analysis of long-term sequelae of COVID-19 2-year after infection. <a href="#">Link</a>                                                                                                                                                                                    |                                                                                                                                                                     |                                                                                                                                                                                                                                                                                                                                                                            |                                                                                                                                                                                                                                                                                                                     |
| <ul style="list-style-type: none"> <li>Global/12 studies</li> <li>Total n= 1, 289,044</li> <li>Criteria:               <ul style="list-style-type: none"> <li>&gt;= 2 years post-covid</li> <li>&gt;=1 outcome: heart GI, skin, respiratory, neurologic, psych</li> </ul> </li> <li>Adults 18+</li> <li>Hospital rate: 2%-100%</li> </ul> | <ul style="list-style-type: none"> <li>Cohort studies</li> </ul>                                                                                                    | <u>Long Covid Definition:</u> NA; >= 2 years post<br><u>Prevalence:</u> 41.7%. (>=1 symptom)<br>Symptom @ 2 years: 2-year v 1-year:<br>Fatigue- 27%. Same*<br>Sleep- 25%. Better<br>Dyspnea- 10%. Same<br>Anxiety- 9%. No data<br>Focus- 8%. No data<br>Myalgia- 6%. Same                                                                                                  | NA                                                                                                                                                                                                                                                                                                                  |
| Robertson et. al. 2023: <sup>7</sup><br>The Epidemiology of Long Coronavirus Disease in US Adults <a href="#">Link</a>                                                                                                                                                                                                                    |                                                                                                                                                                     |                                                                                                                                                                                                                                                                                                                                                                            |                                                                                                                                                                                                                                                                                                                     |
| <ul style="list-style-type: none"> <li>US</li> <li>N=3,024</li> <li>English &amp; Spanish</li> </ul>                                                                                                                                                                                                                                      | <ul style="list-style-type: none"> <li>June/July 2022</li> <li>Survey</li> <li>64% landline</li> <li>Census-weighted</li> <li>Age &amp; Gender- adjusted</li> </ul> | <u>Long Covid Definition:</u> Covid >= 4 weeks prior + fatigue, concentration and/or shortness of breath<br><u>Prevalence=</u> 7.3%* (n= 222)<br><u>US Estimate Prevalence=</u> 18.8 mil<br>*Pulse 7/22 data= 7.5%*                                                                                                                                                        | Limits on (ADLs) among n=222 with Long Covid (est. US prevalence): <ul style="list-style-type: none"> <li>A lot: 25% (4.8 mil)</li> <li>A little: 50% (9.3 mil)</li> <li>None: 25% (4.7 mil)</li> </ul> *Pulse ADL data, Sept-Dec 22:<br>79% any limit & 25% significant limit among those with current Long Covid* |
| Smith M., 2022: <sup>8</sup><br>Estimating Total Morbidity Burden Of COVID-19: Relative Importance Of Death And Disability                                                                                                                                                                                                                |                                                                                                                                                                     |                                                                                                                                                                                                                                                                                                                                                                            |                                                                                                                                                                                                                                                                                                                     |
| <ul style="list-style-type: none"> <li>NA: Burden models based on estimates</li> <li>No data collected</li> </ul>                                                                                                                                                                                                                         | NA                                                                                                                                                                  | <ul style="list-style-type: none"> <li><u>Long Covid Definition:</u> NA, but cites Covid &amp; ME/CFS: fatigue, muscle/body ache &amp; difficulty concentrating.</li> </ul>                                                                                                                                                                                                | <ul style="list-style-type: none"> <li>Model 1 treats Long Covid like ME/CFS &amp; thus applies ME/CFS Disability weights per prior <a href="#">work</a>:           <ul style="list-style-type: none"> <li>Mild CFS: 0.14</li> <li>Moderate CFS: 0.45</li> <li>Severe CFS: 0.76</li> </ul> </li> </ul>              |
| Woodrow et.al. 2023: <sup>9</sup><br>Systematic Review of the Prevalence of Long Covid. <a href="#">Link</a>                                                                                                                                                                                                                              |                                                                                                                                                                     |                                                                                                                                                                                                                                                                                                                                                                            |                                                                                                                                                                                                                                                                                                                     |
| <ul style="list-style-type: none"> <li>China, Europe, NA, Others</li> <li>120 studies: Cohort, Cross-Sectional, Case-Control</li> <li>Community + Hospital + Both</li> </ul>                                                                                                                                                              | <ul style="list-style-type: none"> <li>1/2020-11/2022</li> <li>Systematic Review</li> <li>Adults &amp; Children</li> </ul>                                          | <u>Long Covid Definition:</u> IF >= 3 months self-report of COVID or (+) test: <ul style="list-style-type: none"> <li>Persistent symptoms, and/or</li> <li>Functional disability, and/or</li> <li>New pathology</li> </ul> <u>Prevalence:</u> Overall: 42% (95% CI: 7%-88%) <ul style="list-style-type: none"> <li>Fatigue: 22%</li> <li>Breathing problems:15%</li> </ul> | <u>Function:</u> <ul style="list-style-type: none"> <li>Not Full Health/Fitness: 35% (8%-70%)</li> </ul> Overall- wide ranges, somewhat higher among self-reported                                                                                                                                                  |
| Wulf-Hanson & Vos. 2022: <sup>10</sup>                                                                                                                                                                                                                                                                                                    |                                                                                                                                                                     |                                                                                                                                                                                                                                                                                                                                                                            |                                                                                                                                                                                                                                                                                                                     |

| Estimated Global Proportions of Individuals with Persistent Fatigue, Cognitive, and Respiratory Symptom Clusters Following <u>Symptomatic</u> COVID-19 in 2020 and 2021. <a href="#">Link</a> |                                                                                                                                                                                         |                                                                                                                                                                                                                                                                                                                                                                                                                                                           |                                                                                                                                                                                                                                                                                                                                                         |
|-----------------------------------------------------------------------------------------------------------------------------------------------------------------------------------------------|-----------------------------------------------------------------------------------------------------------------------------------------------------------------------------------------|-----------------------------------------------------------------------------------------------------------------------------------------------------------------------------------------------------------------------------------------------------------------------------------------------------------------------------------------------------------------------------------------------------------------------------------------------------------|---------------------------------------------------------------------------------------------------------------------------------------------------------------------------------------------------------------------------------------------------------------------------------------------------------------------------------------------------------|
| <ul style="list-style-type: none"> <li>○ 22 countries</li> <li>○ 54 studies</li> <li>○ 1.2 million medical records</li> <li>○ Symptomatic only</li> </ul>                                     | <ul style="list-style-type: none"> <li>○ 3/2020-1/2022</li> <li>○ Medical Records</li> <li>○ Hospitalized &amp; Non-Hospitalized</li> <li>○ &lt;20 years &amp; &gt;=20 years</li> </ul> | <p><u>Long Covid Definition:</u> Covid &gt;= 3 months prior</p> <p><u>Global Prevalence:</u> 6.2%</p> <ul style="list-style-type: none"> <li>○ Fatigue cluster- 3.2%</li> <li>○ Cognitive cluster- 2.2%</li> <li>○ Respiratory cluster- 3.7%</li> </ul> <p><u># of Symptom Clusters</u></p> <ul style="list-style-type: none"> <li>○ 1 Symptom= 61.6%</li> <li>○ 2 Symptoms= 24.4%</li> <li>○ 3 Symptoms= 8.5%</li> </ul> <p>Females: app.2x as MALES</p> | <p><u>Disability Weight By Level:</u><br/>(mild/moderate/severe)</p> <ul style="list-style-type: none"> <li>● Fatigue: 0.22 (1 level)</li> <li>● Cognitive: 0.07/0.38 (mild/severe)</li> <li>● Respiratory: 0.02/0.23/0.41</li> </ul> <p>Authors note that on average, living with Long Covid is associated with losing 21% of health.<sup>11</sup></p> |

1. Ford ND, Slaughter D, Edwards D, et al. Long COVID and Significant Activity Limitation Among Adults, by Age - United States, June 1-13, 2022, to June 7-19, 2023. *MMWR Morb Mortal Wkly Rep.* 2023;72(32):866-870.
2. Lau B, Wentz E, Ni Z, et al. Physical Health and Mental Fatigue Disability Associated with Long COVID: Baseline Results from a US Nationwide Cohort. *Am J Med.* 2023.
3. Ma Y, Deng J, Liu Q, Du M, Liu M, Liu J. Long-Term Consequences of Asymptomatic SARS-CoV-2 Infection: A Systematic Review and Meta-Analysis. *Int J Environ Res Public Health.* 2023;20(2).
4. Ma Y, Deng J, Liu Q, Du M, Liu M, Liu J. Long-Term Consequences of COVID-19 at 6 Months and Above: A Systematic Review and Meta-Analysis. *Int J Environ Res Public Health.* 2022;19(11).
5. Perlis RH, Santillana M, Ognyanova K, et al. Prevalence and Correlates of Long COVID Symptoms Among US Adults. *JAMA Netw Open.* 2022;5(10):e2238804.
6. Rahmati M, Udeh R, Yon DK, et al. A systematic review and meta-analysis of long-term sequelae of COVID-19 2-year after SARS-CoV-2 infection: A call to action for neurological, physical, and psychological sciences. *J Med Virol.* 2023;95(6):e28852.
7. Robertson MM, Qasmieh SA, Kulkarni SG, et al. The Epidemiology of Long Coronavirus Disease in US Adults. *Clin Infect Dis.* 2023;76(9):1636-1645.
8. Smith MP. Estimating total morbidity burden of COVID-19: relative importance of death and disability. *J Clin Epidemiol.* 2022;142:54-59.
9. Woodrow M, Carey C, Ziauddeen N, et al. Systematic Review of the Prevalence of Long COVID. *Open Forum Infect Dis.* 2023;10(7):ofad233.
10. Wulf Hanson S, Abbafati C, Aerts JG, et al. Estimated Global Proportions of Individuals With Persistent Fatigue, Cognitive, and Respiratory Symptom Clusters Following Symptomatic COVID-19 in 2020 and 2021. *JAMA.* 2022;328(16):1604-1615.
11. National Academies of Engineering SaM. Long COVID Examining Long-Term Health Effects of COVID-19 and Implications for the Social Security Administration: Proceedings of a Workshop. 2022.

## Supplement Table 2: LC Definitions

### Comparison of Long Covid Symptoms: Global Burden of Disease vs. Household Pulse Survey

**Global Burden of Disease-** Health states, symptom descriptions and disability weight for the 3 Long Covid symptom clusters identified by the GBD Long Covid Study\*

Table 1. Health States, Symptom Descriptions, and Disability Weights Used for the 3 Long COVID Symptom Clusters

| Symptom cluster                                    | Health state                                    | Symptom description                                                                                                                                                    | Disability weight (95% UI) <sup>a</sup> |
|----------------------------------------------------|-------------------------------------------------|------------------------------------------------------------------------------------------------------------------------------------------------------------------------|-----------------------------------------|
| <b>Ongoing respiratory problems</b>                |                                                 |                                                                                                                                                                        |                                         |
| Mild symptoms                                      | Mild chronic respiratory problems               | Cough and shortness of breath after heavy physical activity, but able to walk long distances and climb stairs                                                          | 0.02 (0.01-0.04)                        |
| Moderate symptoms                                  | Moderate chronic respiratory problems           | Cough, wheezing, and shortness of breath even after light physical activity; feel tired and can only walk short distances or climb a few stairs                        | 0.23 (0.15-0.31)                        |
| Severe symptoms                                    | Severe chronic respiratory problems             | Cough, wheezing, and shortness of breath all the time; great difficulty walking even short distances or climbing any stairs, feel tired when at rest, and have anxiety | 0.41 (0.27-0.56)                        |
| <b>Cognitive problems</b>                          |                                                 |                                                                                                                                                                        |                                         |
| Mild symptoms <sup>b</sup>                         | Mild cognitive problems                         | Some trouble remembering recent events and find it hard to concentrate and make decisions and plans                                                                    | 0.07 (0.05-0.10)                        |
| Severe symptoms <sup>b</sup>                       | Moderate cognitive problems                     | Memory problems and confusion, feel disoriented, hear voices sometimes that are not real, and need help with some daily activities                                     | 0.38 (0.25-0.51)                        |
| Persistent fatigue with bodily pain or mood swings | Postacute consequences of an infectious disease | Always tired and easily upset; feel pain all over the body and have depression                                                                                         | 0.22 (0.15-0.31)                        |

Abbreviation: UI, uncertainty interval.

<sup>a</sup> Quantifies health loss as a fraction of time lived within a health state (0 indicates full health; 1 indicates complete loss of health).

<sup>b</sup> Also used in the Global Burden of Disease Study for mild and moderate dementia. Additional details appear in eSection 1 in Supplement 1.

\*Reprinted from: Wulf Hanson S, Abbafati C, Aerts JG, Al-Aly Z, Ashbaugh C, Ballouz T, et al. Estimated Global Proportions of Individuals With Persistent Fatigue, Cognitive, and Respiratory Symptom Clusters Following Symptomatic COVID-19 in 2020 and 2021. *JAMA*. 2022;328(16):1604-15.

**Household Pulse Survey-** identifies US adults with Long Covid by asking whether they had any of the following symptoms for 3 months or longer that they hadn't had prior to COVID-19: “

Yes” (vs. “No”) The HPS identified these symptoms as including the following:

- Tiredness or fatigue,
- difficulty thinking, concentrating, forgetfulness, or memory problems (sometimes referred to as “brain fog”),
- difficulty breathing or shortness of breath,
- joint or muscle pain,
- fast-beating or pounding heart (also known as heart palpitations),
- chest pain,
- dizziness on standing,
- menstrual changes,
- changes to taste/smell, or
- inability to exercise

These symptoms are listed in the US Dept. of Health and Human Services in its Guidance on “[Long Covid](#)” as a Disability Under the ADA, Section 504, and Section 1557.”

 Centers for Disease Control and Prevention  
CDC 24/7: Saving Lives. Protecting People™

National Center for Health Statistics

CDC > NCHS > COVID-19 Data from NCHS > Health Care Access, Telemedicine, and Mental Health

Long COVID

Household Pulse Survey

### Supplement Table 3: YLD and Funding for 70 Conditions

| NIH Research, Condition, Disease Categorization (RCDC) | YLD/100,000 | NIH 2024 \$, millions | NIH Research, Condition, Disease Categorization (RCDC) | YLD/100,000 | NIH 2024 \$, millions |
|--------------------------------------------------------|-------------|-----------------------|--------------------------------------------------------|-------------|-----------------------|
| Alcoholism, Alcohol Use and Health                     | 303.7       | 639                   | Infertility                                            | 8.4         | 199                   |
| Alzheimer's Disease                                    | 279.4       | 3515                  | Inflammatory Bowel Disease                             | 43.6        | 206                   |
| Anorexia                                               | 23.4        | 16                    | Kidney Disease                                         | 232.2       | 708                   |
| Anxiety Disorders                                      | 675.7       | 274                   | Liver Cancer                                           | 2.8         | 978                   |
| Arthritis                                              | 888.1       | 324                   | <b>Long COVID</b>                                      | 319.9       | 80                    |
| Asthma                                                 | 355.7       | 306                   | Lung                                                   | 48.1        | 2491                  |
| Attention Deficit Disorder (ADD)                       | 11.3        | 87                    | Lung cancer                                            | 25.1        | 555                   |
| Autism                                                 | 80.9        | 341                   | Lymphoma                                               | 18.5        | 347                   |
| Brain Cancer                                           | 3.7         | 456                   | Macular Degeneration                                   | 6.6         | 104                   |
| Breast Cancer                                          | 77.5        | 850                   | Malaria                                                | 0.0         | 225                   |
| Cervical Cancer                                        | 3.7         | 171                   | ME/CFS                                                 | 598.0       | 13                    |
| Chronic Liver Disease and Cirrhosis                    | 5.6         | 978                   | Methamphetamine                                        | 18.6        | 110                   |
| Chronic Obstructive Pulmonary Disease                  | 775.3       | 150                   | Migraines                                              | 739.6       | 49                    |
| Colo-Rectal Cancer                                     | 48.7        | 401                   | Multiple Sclerosis                                     | 40.3        | 129                   |
| Dental/Oral and Craniofacial Disease                   | 467.8       | 754                   | Nutrition                                              | 38.2        | 2341                  |
| Depression                                             | 927.2       | 702                   | Otitis Media                                           | 11.8        | 11                    |
| Diabetes                                               | 1,188.7     | 1292                  | Ovarian Cancer                                         | 5.5         | 204                   |
| Digestive Diseases                                     | 159.3       | 2708                  | Pancreatic Cancer                                      | 4.6         | 307                   |
| Digestive Diseases - (Gallbladder)                     | 80.2        | 22                    | Parkinson's Disease                                    | 33.8        | 277                   |
| Digestive Diseases - (Peptic Ulcer)                    | 9.0         | 9                     | Perinatal Period, Conditions Originating in            | 158.0       | 940                   |
| Down Syndrome                                          | 2.0         | 143                   | Pneumonia                                              | 5.6         | 160                   |
| Drug Abuse (NIDA only)                                 | 1,140.5     | 1663                  | Prescription Drug Abuse                                | 964.5       | 129                   |
| Eating Disorders                                       | 85.6        | 61                    | Preterm, Low Birth Weight, Newborn Health              | 123.2       | 458                   |
| Endometriosis                                          | 21.1        | 29                    | Prostate Cancer                                        | 86.9        | 322                   |
| Epilepsy                                               | 74.7        | 244                   | Psoriasis                                              | 127.6       | 15                    |
| Fibroid Tumors (Uterine)                               | 25.4        | 16                    | Rheumatoid Arthritis                                   | 81.3        | 95                    |
| Headaches                                              | 833.3       | 58                    | Schizophrenia                                          | 397.5       | 311                   |
| Heart Disease - Coronary Heart Disease                 | 120.4       | 424                   | Sexually Transmitted Infections                        | 17.3        | 395                   |
| Hepatitis                                              | 2.6         | 378                   | Sickle Cell Disease                                    | 5.5         | 161                   |
| Hepatitis - A                                          | 2.1         | 6                     | Stroke                                                 | 433.5       | 444                   |
| Hepatitis - B                                          | 0.2         | 138                   | Substance Abuse                                        | 1,444.2     | 2597                  |
| Hepatitis - C                                          | 0.1         | 113                   | Suicide                                                | 18.4        | 174                   |
| HIV/AIDS                                               | 54.2        | 3294                  | Tuberculosis                                           | 1.5         | 635                   |
| Hodgkin's Disease                                      | 2.4         | 21                    | Urologic Diseases                                      | 49.0        | 682                   |
| Hypertension                                           | 47.9        | 402                   | Uterine Cancer                                         | 16.6        | 42                    |
|                                                        |             |                       | Violence Research                                      | 81.1        | 194                   |
